# Supplementary material
Source: Springer Nature journal article supplement (https://www.springermedizin.de/resource/supplementary/12885_2013_4250_MOESM4_ESM.pdf/9467282)

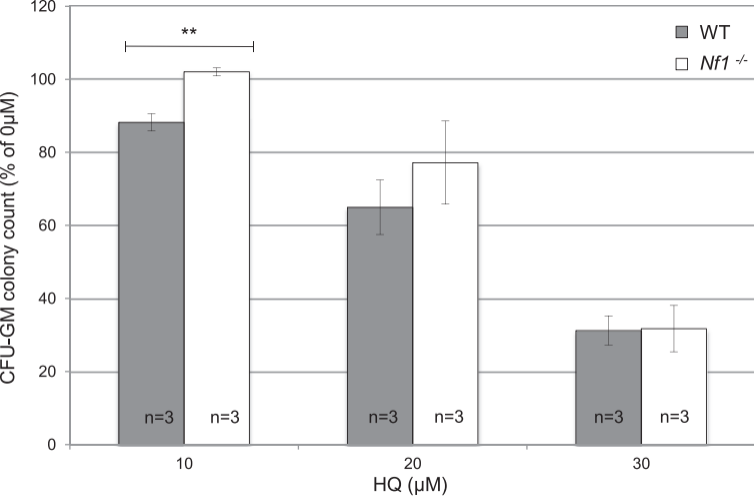

\*\* 0.001 < p < 0.01

Supplement: MOESM4 [file 9467282]
